# Supplementary material for: ANXA5 and VEGFA Gene Variants in Women with Early Pregnancy Losses from North Macedonia
Source: PubMed Central journal article supplement — Balkan J Med Genet. 2024 Sep 6;27(1):5–14. doi: 10.2478/bjmg-2024-0006 (PMC11384135; doi:10.2478/bjmg-2024-0006), 2024-09-06
Supplement: bjmg-2024-0006_sm.pdf [file bjmg-2024-0006_sm.pdf]

## ***ANXA5* AND *VEGFA* GENE VARIANTS IN WOMEN WITH EARLY PREGNANCY LOSSES FROM NORTH MACEDONIA**

Terzikić M<sup>1, #</sup>, Bozhinovski Gj<sup>1, #</sup>, Branoski A<sup>1</sup>, Dimkovska M<sup>1</sup>,  
Kubelka-Sabit K<sup>2,3</sup>, Plaseska-Karanfilska D<sup>1,\*</sup>

**\*Corresponding Author:** Corresponding author, Prof. Dijana Plaseska-Karanfilska, MD, PhD.  
Research Centre for Genetic Engineering and Biotechnology “Georgi D. Efremov”,  
Macedonian Academy of Science and Arts, Skopje, North Macedonia, e-mail: dijana@manu.edu.mk

<sup>#</sup> equal contribution

**Supplementary Table 1.** The results of the haplotypes in the *ANXA5* gene in the group of women with EPLs and Control group based on history of pregnancy loss and previous live births

| Haplotype    | Women with one EPLs (n=81)               | %             | p-value            | Women with two or more EPLs (n=109)    | %             | p-value      | Controls (n=190) | %             |
|--------------|------------------------------------------|---------------|--------------------|----------------------------------------|---------------|--------------|------------------|---------------|
| N/N          | 51                                       | 62.96         | <b>0.0001</b>      | 84                                     | 77.06         | 0.06         | 161              | 84.73         |
| N/M1         | 7                                        | 8.64          | 0.12               | 8                                      | 7.34          | 0.18         | 8                | 4.21          |
| M1/M1        | 0                                        | 0.00          | /                  | 0                                      | 0.00          | /            | 1                | 0.53          |
| N/M2         | 21                                       | 25.93         | <b>&lt;0.00001</b> | 15                                     | 13.76         | <b>0.057</b> | 14               | 7.37          |
| M2/M2        | 2                                        | 2.47          | 0.21               | 2                                      | 1.83          | 0.30         | 1                | 0.53          |
| M1/M2        | 0                                        | 0.00          | /                  | 0                                      | 0.00          | /            | 5                | 2.63          |
| <b>Total</b> | <b>81</b>                                | <b>100.00</b> |                    | <b>109</b>                             | <b>100.00</b> |              | <b>190</b>       | <b>100.00</b> |
| Haplotype    | Women with EPLs and no livebirth (n=151) | %             | p-value            | Women with EPLs and a livebirth (n=39) | %             | p-value      | Controls (n=190) | %             |
| N/N          | 106                                      | 70.20         | <b>0.0010</b>      | 29                                     | 74.36         | 0.09         | 161              | 84.73         |
| N/M1         | 10                                       | 6.62          | 0.22               | 5                                      | 12.82         | <b>0.05</b>  | 8                | 4.21          |
| M1/M1        | 0                                        | 0.00          | /                  | 0                                      | 0.00          | /            | 1                | 0.52          |
| N/M2         | 31                                       | 20.53         | <b>0.0003</b>      | 5                                      | 12.82         | 0.20         | 14               | 7.37          |
| M2/M2        | 4                                        | 2.65          | 0.12               | 0                                      | 0.00          | /            | 1                | 0.52          |
| M1/M2        | 0                                        | 0.00          | /                  | 0                                      | 0.00          | /            | 5                | 7.90          |
| <b>Total</b> | <b>151</b>                               | <b>100.00</b> |                    | <b>39</b>                              | <b>100.00</b> |              | <b>190</b>       | <b>100.00</b> |

**Supplementary Table 2.** The results of the haplotypes in the *ANXA5* gene in the group of women with EPLs and Control group based on maternal age and gestational week of the pregnancy

| Haplotypes   | Maternal age                           |               |              |                 |               |                        |                  |               |                 |               |                        |               |             |                 |               |
|--------------|----------------------------------------|---------------|--------------|-----------------|---------------|------------------------|------------------|---------------|-----------------|---------------|------------------------|---------------|-------------|-----------------|---------------|
|              | ≤30                                    |               |              |                 | 31-35         |                        |                  |               | ≥36             |               |                        |               |             |                 |               |
|              | Women with EPLs (n=85)                 | %             | p-value      | Controls (n=71) | %             | Women with EPLs (n=69) | %                | p-value       | Controls (n=50) | %             | Women with EPLs (n=36) | %             | p-value     | Controls (n=69) | %             |
| N/N          | 61                                     | 71.76         | <b>0.007</b> | 63              | 88.73         | 51                     | 73.91            | 0.08          | 43              | 86.00         | 23                     | 63.89         | 0.1         | 55              | 79.70         |
| N/M1         | 4                                      | 4.71          | 0.7          | 2               | 2.82          | 9                      | 13.04            | <b>0.03</b>   | 1               | 2.00          | 2                      | 5.55          | 0.7         | 5               | 7.25          |
| M1/M1        | 0                                      | 0.00          | /            | 0               | 0.00          | 0                      | 0.00             | /             | 0               | 0.00          | 0                      | 0.00          | /           | 1               | 1.45          |
| N/M2         | 19                                     | 22.35         | <b>0.003</b> | 4               | 5.63          | 7                      | 10.15            | 0.5           | 4               | 8.00          | 10                     | 27.78         | <b>0.01</b> | 6               | 8.70          |
| M2/M2        | 1                                      | 1.18          | /            | 0               | 0.00          | 2                      | 2.90             | 0.8           | 1               | 2.00          | 1                      | 2.78          | /           | 0               | 0.00          |
| M1/M2        | 0                                      | 0.00          | /            | 2               | 2.82          | 0                      | 0.00             | /             | 1               | 2.00          | 0                      | 0.00          | /           | 2               | 2.90          |
| <b>Total</b> | <b>85</b>                              | <b>100.00</b> |              | <b>71</b>       | <b>100.00</b> | <b>69</b>              | <b>100.00</b>    |               | <b>50</b>       | <b>100.00</b> | <b>36</b>              | <b>100.00</b> |             | <b>69</b>       | <b>100.00</b> |
| Haplotypes   | Gestational week of the last pregnancy |               |              |                 |               |                        |                  |               |                 |               |                        |               |             |                 |               |
|              | 6-9 (n=96)                             |               |              | 10-11 (n=17)    |               |                        | Controls (n=190) |               |                 | ND (n=67)     |                        |               |             |                 |               |
|              | %                                      | p-value       | %            | p-value         | %             | p-value                | %                | p-value       | %               | p-value       | %                      | p-value       |             |                 |               |
| N/N          | 68                                     | 70.83         | <b>0.005</b> | 17              | 62.96         | <b>0.01</b>            | 161              | 84.73         | 50              | 74.63         |                        |               |             |                 |               |
| N/M1         | 7                                      | 7.29          | 0.2          | 2               | 7.41          | 0.4                    | 8                | 4.21          | 6               | 8.96          |                        |               |             |                 |               |
| M1/M1        | 0                                      | 0.00          | /            | 0               | 0.00          | /                      | 1                | 0.53          | 0               | 0.00          |                        |               |             |                 |               |
| N/M2         | 17                                     | 17.71         | <b>0.008</b> | 7               | 25.93         | <b>0.007</b>           | 14               | 7.37          | 12              | 17.91         |                        |               |             |                 |               |
| M2/M2        | 3                                      | 3.12          | 0.1          | 1               | 3.70          | 0.2                    | 1                | 0.53          | 0               | 0.00          |                        |               |             |                 |               |
| M1/M2        | 0                                      | 0.00          | /            | 0               | 0.00          | /                      | 5                | 2.63          | 0               | 0.00          |                        |               |             |                 |               |
| <b>Total</b> | <b>96</b>                              | <b>100.00</b> |              | <b>27</b>       | <b>100.00</b> |                        | <b>190</b>       | <b>100.00</b> | <b>67</b>       | <b>100.00</b> |                        |               |             |                 |               |

**Supplementary Table 3.** The genotypic frequency of the examined *VEGFA* variants in the group of women with EPLs and Control groups regarding the history of pregnancy losses and previous live births

| c.-1154G>A | Women with one EPL (n=81)                | %      | p-value | Women with two or more EPLs (n=109)    | %      | p-value     | Controls (n=190) | %      |
|------------|------------------------------------------|--------|---------|----------------------------------------|--------|-------------|------------------|--------|
| GG         | 39                                       | 48.15  | 0.55    | 53                                     | 48.62  | 0.56        | 99               | 52.11  |
| GA         | 36                                       | 44.44  | 0.24    | 40                                     | 36.70  | 1           | 70               | 36.84  |
| AA         | 6                                        | 7.41   | 0.25    | 16                                     | 14.68  | 0.23        | 21               | 11.05  |
| Total      | 81                                       | 100.00 |         | 109                                    | 100.00 |             | 190              | 100.00 |
| c.*237C>T  |                                          |        |         |                                        |        |             |                  |        |
| CC         | 63                                       | 77.77  | 0.32    | 74                                     | 67.89  | 0.24        | 141              | 74.21  |
| CT         | 17                                       | 21.00  | 0.34    | 33                                     | 30.28  | 0.25        | 46               | 24.21  |
| TT         | 1                                        | 1.23   | 0.76    | 2                                      | 1.83   | 0.60        | 3                | 1.58   |
| Total      | 81                                       | 100.00 |         | 109                                    | 100.00 |             | 190              | 100.00 |
| c.-1154G>A | Women with EPLs and no livebirth (n=151) | %      | p-value | Women with EPLs and a livebirth (n=39) | %      | p-value     | Controls (n=190) | %      |
| GG         | 78                                       | 51.66  | 0.93    | 14                                     | 35.90  | <b>0.05</b> | 99               | 52.11  |
| GA         | 55                                       | 36.42  | 1       | 21                                     | 53.85  | <b>0.04</b> | 70               | 36.84  |
| AA         | 18                                       | 11.92  | 0.80    | 4                                      | 10.25  | 0.65        | 21               | 11.05  |
| Total      | 151                                      | 100.00 |         | 39                                     | 100.00 |             | 190              | 100.00 |
| c.*237C>T  |                                          |        |         |                                        |        |             |                  |        |
| CC         | 108                                      | 71.52  | 0.58    | 29                                     | 74.36  | 0.45        | 141              | 74.21  |
| CT         | 41                                       | 27.15  | 0.54    | 9                                      | 23.08  | 0.63        | 46               | 24.21  |
| TT         | 2                                        | 1.32   | 0.73    | 1                                      | 2.56   | 0.53        | 3                | 1.58   |
| Total      | 151                                      | 100.00 |         | 39                                     | 100.00 |             | 190              | 100.00 |

**Supplementary Table 4.** The results of the genotypes in the *VEGFA* gene in the group of women with EPLs and Control group based on maternal age and gestational week of the pregnancy

| c.-1154G>A                             | Maternal age           |        |         |                 |        |                        |                  |         |                 |        |                        |       |         |                 |       |
|----------------------------------------|------------------------|--------|---------|-----------------|--------|------------------------|------------------|---------|-----------------|--------|------------------------|-------|---------|-----------------|-------|
|                                        | ≤30                    |        |         |                 | 31-35  |                        |                  |         | ≥36             |        |                        |       |         |                 |       |
|                                        | Women with EPLs (n=85) | %      | p-value | Controls (n=71) | %      | Women with EPLs (n=69) | %                | p-value | Controls (n=50) | %      | Women with EPLs (n=36) | %     | p-value | Controls (n=69) | %     |
| GG                                     | 40                     | 47.06  | 0.53    | 37              | 52.11  | 35                     | 50.72            | 0.43    | 29              | 58     | 17                     | 47.22 | 1       | 33              | 47.83 |
| GA                                     | 33                     | 38.82  | 0.78    | 26              | 36.62  | 26                     | 37.68            | 0.38    | 15              | 30     | 17                     | 47.22 | 0.61    | 29              | 42.03 |
| AA                                     | 12                     | 14.12  | 0.4     | 8               | 11.27  | 8                      | 11.59            | 1       | 6               | 12     | 2                      | 5.56  | 0.4     | 7               | 10.14 |
| Total                                  | 85                     | 100.0  |         | 71              | 100.0  | 69                     | 100.0            |         | 50              | 100.0  | 36                     | 100.0 |         | 69              | 100.0 |
| c.*237C>T                              |                        |        |         |                 |        |                        |                  |         |                 |        |                        |       |         |                 |       |
| CC                                     | 65                     | 76.47  | 1       | 54              | 76.06  | 48                     | 69.55            | 1       | 35              | 70     | 24                     | 66.67 | 0.3     | 52              | 75.36 |
| CT                                     | 18                     | 21.18  | 0.68    | 17              | 23.94  | 20                     | 28.90            | 1       | 14              | 28     | 12                     | 33.33 | 0.2     | 15              | 21.74 |
| TT                                     | 2                      | 2.35   | /       | 0               | 0.00   | 1                      | 1.45             | 0.82    | 1               | 2      | 0                      | 0.00  | /       | 2               | 2.90  |
| Total                                  | 85                     | 100.0  |         | 71              | 100.0  | 69                     | 100.0            |         | 50              | 100.0  | 36                     | 100.0 |         | 69              | 100.0 |
| Gestational week of the last pregnancy |                        |        |         |                 |        |                        |                  |         |                 |        |                        |       |         |                 |       |
| c.-1154G>A                             | 6-9 (n=96)             | %      | p-value | 10-11 (n=17)    | %      | p-value                | Controls (n=190) | %       | ND (n=67)       | %      |                        |       |         |                 |       |
| GG                                     | 47                     | 48.96  | 0.6     | 10              | 37.04  | 0.15                   | 99               | 52.11   | 35              | 52.24  |                        |       |         |                 |       |
| GA                                     | 33                     | 34.37  | 0.7     | 16              | 59.26  | <b>0.03</b>            | 70               | 36.84   | 27              | 40.30  |                        |       |         |                 |       |
| AA                                     | 16                     | 16.67  | 0.2     | 1               | 3.70   | 0.3                    | 21               | 11.05   | 5               | 7.46   |                        |       |         |                 |       |
| Total                                  | 96                     | 100.00 |         | 27              | 100.00 |                        | 190              | 100.00  | 67              | 100.00 |                        |       |         |                 |       |
| c.*237C>T                              |                        |        |         |                 |        |                        |                  |         |                 |        |                        |       |         |                 |       |
| CC                                     | 68                     | 70.83  | 0.5     | 25              | 92.59  | <b>0.03</b>            | 141              | 74.21   | 44              | 65.67  |                        |       |         |                 |       |
| CT                                     | 26                     | 27.08  | 0.6     | 2               | 7.41   | <b>0.05</b>            | 46               | 24.21   | 22              | 32.83  |                        |       |         |                 |       |
| TT                                     | 2                      | 2.08   | 0.7     | 0               | 0.00   | /                      | 3                | 1.58    | 1               | 1.50   |                        |       |         |                 |       |
| Total                                  | 96                     |        |         | 27              |        |                        | 190              | 100.00  | 67              | 100.00 |                        |       |         |                 |       |
